# Supplementary material for: miR-454 functions as an oncogene by inhibiting CHD5 in hepatocellular carcinoma
Source: PubMed Central journal article supplement (PMC4770768; doi:10.18632/oncotarget.4407), 2015-07-30
Supplement: oncotarget-06-39225-s001.pdf [file oncotarget-06-39225-s001.pdf]

**SUPPLEMENTARY TABLES****Supplementary Table S1. Summary of clinicopathological parameters of patients with hepatocellular carcinoma**

|                | Clinicopathological parameters | Number of cases |
|----------------|--------------------------------|-----------------|
| Gender         | ≥55                            | 27              |
|                | <55                            | 23              |
| Age            | Male                           | 36              |
|                | Female                         | 14              |
| With cirrhosis | Present                        | 33              |
|                | Absent                         | 17              |
| TNM stage      | I, II                          | 35              |
|                | III, IV                        | 15              |

**Supplementary Table S2. Primer sequence**

| Name      | Sequence (5'-3')          |
|-----------|---------------------------|
| miRNA-709 | TGCGGGGAGGCAGAGGCA        |
|           | CCAGTGCAGGGTCCGAGGT       |
| U6 snRNA  | TGCGGGTGCTCGCTTCGGCAGC    |
|           | CCAGTGCAGGGTCCGAGGT       |
| GAPDH     | GGTGAAGGTCGGTGTGAACG      |
|           | CTCGCTCCTGGAAGATGGTG      |
| CHD5      | TGCTTAAAGGAGCCCAAGTC      |
|           | TTGGTCAGCGTGTGGTAATC      |
| Ki-67     | TCCTTTGGTGGGCACCTAAGACCTG |
|           | TGATGGTTGAGGTCGTCCTTGATG  |
